# Supplementary material
Source: publisher site journal article supplement (https://www.dovepress.com/get_supplementary_file.php?f=442725.docx)
Supplement: Supplementary file 1 [file get_supplementary_file.php]

**Supplement Table 1.** Mendelian randomization (MR) analysis of overall COPD with psychiatric disorders risk

| Outcome | No.of SNPs | Method | OR(95% CI) | P-value |
| --- | --- | --- | --- | --- |
| Alzheimer’s Disease | 9 | MR Egger | 0.995(0.929,1.067) | 0.902 |
| 9 | Weighted median | 1.001(0.993,1.008) | 0.874 |
| 9 | Simple mode | 1.003(0.990,1.016) | 0.701 |
| 9 | Weighted mode | 1.003(0.991,1.014) | 0.640 |
| Anorexia nervosa | 8 | MR Egger | 0.970(0.896,1.051) | 0.484 |
| 8 | Weighted median | 1.000(0.988,1.013) | 0.973 |
| 8 | Simple mode | 0.999(0.980,1.019) | 0.933 |
| 8 | Weighted mode | 0.999(0.981,1.018) | 0.940 |
| Anxiety Disorder | 7 | MR Egger | 0.994(0.989,0.999) | 0.054 |
| 7 | Weighted median | 1.000(0.999,1.001) | 0.383 |
| 7 | Simple mode | 1.001(0.999,1.003) | 0.377 |
| 7 | Weighted mode | 0.999(0.998,1.001) | 0.412 |
| Attention Deficit Hyperactivity Disorder | 6 | MR Egger | 578.002(1.680,198854.1) | 0.099 |
| 6 | Weighted median | 0.524(0.503,0.546) | ＜0.001 |
| 6 | Simple mode | 0.321(0.313,0.329) | ＜0.001 |
| 6 | Weighted mode | 0.324(0.315,0.333) | ＜0.001 |
| Bipolar Disorder | 9 | MR Egger | 7.279(0.035,1510.357) | 0.489 |
| 9 | Weighted median | 2.318(2.258,2.379) | ＜0.001 |
| 9 | Simple mode | 2.796(2.733,2.861) | ＜0.001 |
| 9 | Weighted mode | 2.619(2.568,2.671) | ＜0.001 |
| Major Depressive Disorder | 8 | MR Egger | 0.993(0.971,1.017) | 0.608 |
| 8 | Weighted median | 1.001(0.996,1.005) | 0.692 |
| 8 | Simple mode | 0.999(0.993,1.005) | 0.823 |
| 8 | Weighted mode | 0.999(0.994,1.005) | 0.849 |
| Multiple disorders | 6 | MR Egger | 0.910(0.705,1.175) | 0.511 |
| 6 | Weighted median | 1.010(0.989,1.031) | 0.348 |
| 6 | Simple mode | 1.019(0.994,1.046) | 0.196 |
| 6 | Weighted mode | 1.007(0.989,1.025) | 0.490 |
| Obsessive-compulsive disorder | 9 | MR Egger | 0.157(0.001,40.019) | 0.533 |
| 9 | Weighted median | 0.428(0.405,0.452) | ＜0.001 |
| 9 | Simple mode | 0.359(0.346,0.372) | ＜0.001 |
| 9 | Weighted mode | 0.365(0.351,0.379) | ＜0.001 |
| Schizophrenia | 8 | MR Egger | 0.912(0.838,0.993) | 0.077 |
| 8 | Weighted median | 1.005(0.994,1.015) | 0.344 |
| 8 | Simple mode | 1.014(0.998,1.031) | 0.126 |
| 8 | Weighted mode | 1.007(0.989,1.027) | 0.456 |
| Post Traumatic Stress Disorder | 10 | MR Egger | 10.058(0.090,1118.948) | 0.365 |
| 10 | Weighted median | 2.303(2.241,2.366) | ＜0.001 |
| 10 | Simple mode | 2.688(2.622,2.756) | ＜0.001 |
| 10 | Weighted mode | 2.551(2.502,2.601) | ＜0.001 |

**Supplement Table 2.** Mendelian randomization (MR) analysis of ever smoker COPD with psychiatric disorders risk

| Outcome | No.of SNPs | Method | OR(95% CI) | P-value |
| --- | --- | --- | --- | --- |
| Alzheimer’s Disease | 10 | MR Egger | 0.970(0.928,1.015) | 0.225 |
| 10 | Weighted median | 0.995(0.987,1.003) | 0.228 |
| 10 | Simple mode | 1.000(0.987,1.013) | 0.973 |
| 10 | Weighted mode | 0.999(0.985,1.014) | 0.942 |
| Anorexia nervosa | 10 | MR Egger | 0.959(0.868,1.060) | 0.439 |
| 10 | Weighted median | 0.998(0.985,1.012) | 0.788 |
| 10 | Simple mode | 1.003(0.977,1.030) | 0.801 |
| 10 | Weighted mode | 1.002(0.977,1.027) | 0.868 |
| Anxiety Disorder | 9 | MR Egger | 0.993(0.988,0.997) | 0.017 |
| 9 | Weighted median | 0.999(0.998,1.000) | 0.141 |
| 9 | Simple mode | 0.999(0.998,1.001) | 0.477 |
| 9 | Weighted mode | 0.999(0.998,1.000) | 0.315 |
| Attention Deficit Hyperactivity Disorder | 8 | MR Egger | 3.424(0.130,89.796) | 0.488 |
| 8 | Weighted median | 2.501(2.446,2.558) | ＜0.001 |
| 8 | Simple mode | 2.537(2.446,2.631) | ＜0.001 |
| 8 | Weighted mode | 2.449(2.406,2.492) | ＜0.001 |
| Bipolar Disorder | 9 | MR Egger | 1.237(0.005,306.439) | 0.942 |
| 9 | Weighted median | 0.578(0.473,0.707) | ＜0.001 |
| 9 | Simple mode | 0.362(0.355,0.370) | ＜0.001 |
| 9 | Weighted mode | 0.388(0.381,0.396) | ＜0.001 |
| Major Depressive Disorder | 9 | MR Egger | 0.995(0.972,1.019) | 0.713 |
| 9 | Weighted median | 1.000(0.996,1.004) | 0.948 |
| 9 | Simple mode | 1.001(0.994,1.007) | 0.833 |
| 9 | Weighted mode | 0.999(0.993,1.006) | 0.898 |
| Multiple disorders | 6 | MR Egger | 1.106(0.904,1.352) | 0.381 |
| 6 | Weighted median | 1.038(1.022,1.053) | ＜0.001 |
| 6 | Simple mode | 1.031(0.989,1.075) | 0.212 |
| 6 | Weighted mode | 1.038(1.022,1.054) | 0.005 |
| Obsessive-compulsive disorder | 9 | MR Egger | 1.293(0.005,310.156) | 0.929 |
| 9 | Weighted median | 1.877(1.510,2.333) | ＜0.001 |
| 9 | Simple mode | 2.812(2.707,2.920) | ＜0.001 |
| 9 | Weighted mode | 2.653(2.556,2.753) | ＜0.001 |
| Schizophrenia | 9 | MR Egger | 1.004(0.858,1.175) | 0.958 |
| 9 | Weighted median | 1.003(0.993,1.013) | 0.495 |
| 9 | Simple mode | 1.000(0.983,1.017) | 0.988 |
| 9 | Weighted mode | 1.001(0.983,1.020) | 0.869 |
| Post Traumatic Stress Disorder | 11 | MR Egger | 3.780(0.023,610.588) | 0.620 |
| 11 | Weighted median | 2.390(2.322,2.460) | ＜0.001 |
| 11 | Simple mode | 2.644(2.592,2.696) | ＜0.001 |
| 11 | Weighted mode | 2.550(2.506,2.594) | ＜0.001 |

**Supplement Table 3.** Mendelian randomization (MR) analysis of never smoker COPD with psychiatric disorders risk

| Outcome | No.of SNPs | Method | OR(95% CI) | P-value |
| --- | --- | --- | --- | --- |
| Alzheimer’s Disease | 9 | MR Egger | 0.996(0.929,1.067) | 0.906 |
| 9 | Weighted median | 1.000(0.992,1.009) | 0.891 |
| 9 | Simple mode | 1.002(0.991,1.014) | 0.679 |
| 9 | Weighted mode | 1.003(0.992,1.014) | 0.634 |
| Anorexia nervosa | 8 | MR Egger | 0.970(0.896,1.051) | 0.487 |
| 8 | Weighted median | 1.000(0.988,1.012) | 0.972 |
| 8 | Simple mode | 0.999(0.981,1.017) | 0.927 |
| 8 | Weighted mode | 0.999(0.980,1.018) | 0.950 |
| Anxiety Disorder | 7 | MR Egger | 0.994(0.989,0.998) | 0.054 |
| 7 | Weighted median | 1.000(0.999,1.001) | 0.412 |
| 7 | Simple mode | 1.001(0.999,1.003) | 0.335 |
| 7 | Weighted mode | 0.999(0.997,1.001) | 0.397 |
| Attention Deficit Hyperactivity Disorder | 6 | MR Egger | 0.002(0.001,0.618) | 0.101 |
| 6 | Weighted median | 1.904(1.810,2.003) | ＜0.001 |
| 6 | Simple mode | 3.125(3.035,3.217) | ＜0.001 |
| 6 | Weighted mode | 3.091(3.006,3.179) | ＜0.001 |
| Bipolar Disorder | 9 | MR Egger | 7.219(0.036,1459,515) | 0.489 |
| 9 | Weighted median | 2.316(2.255,2.378) | ＜0.001 |
| 9 | Simple mode | 2.797(2.737,2.859) | ＜0.001 |
| 9 | Weighted mode | 2.620(2.568,2.672) | ＜0.001 |
| Major Depressive Disorder | 8 | MR Egger | 0.993(0.971,1.017) | 0.608 |
| 8 | Weighted median | 1.001(0.996,1.005) | 0.686 |
| 8 | Simple mode | 0.999(0.993,1.005) | 0.801 |
| 8 | Weighted mode | 0.999(0.994,1.005) | 0.847 |
| Multiple disorders | 6 | MR Egger | 0.910(0.705,1.174) | 0.510 |
| 6 | Weighted median | 1.010(0.990,1.030) | 0.340 |
| 6 | Simple mode | 1.020(0.994,1.047) | 0.190 |
| 6 | Weighted mode | 1.006(0.990,1.024) | 0.472 |
| Obsessive-compulsive disorder | 9 | MR Egger | 0.158(0.001,39,357) | 0.533 |
| 9 | Weighted median | 0.428(0.406,0.451) | ＜0.001 |
| 9 | Simple mode | 0.361(0.347,0.375) | ＜0.001 |
| 9 | Weighted mode | 0.364(0.350,0.378) | ＜0.001 |
| Schizophrenia | 8 | MR Egger | 0.912(0.838,0.993) | 0.079 |
| 8 | Weighted median | 1.005(0.995,1.015) | 0.345 |
| 8 | Simple mode | 1.014(0.996,1.033) | 0.161 |
| 8 | Weighted mode | 1.007(0.990,1.025) | 0.425 |
| Post Traumatic Stress Disorder | 10 | MR Egger | 9.956(0.091,1082,619) | 0.365 |
| 10 | Weighted median | 2.301(2.235,2.369) | ＜0.001 |
| 10 | Simple mode | 2.690(2.623,2.759) | ＜0.001 |
| 10 | Weighted mode | 2.553(2.501,2.606) | ＜0.001 |
